# Supplementary material
Source: PubMed Central journal article supplement (PMC5967427)
Supplement: CJN.06430617SupplementaryData.pdf [file CJN.06430617SupplementaryData.pdf]

## Non-depressive psychosocial factors and CKD outcomes in Black Americans

### Supplemental Tables

**Supplemental Table 1: Participant characteristics at baseline and follow up, stratified by inclusion status**

| Baseline covariates                                                                                                        | All<br>N=5301    | Inclusion status   |                    |
|----------------------------------------------------------------------------------------------------------------------------|------------------|--------------------|--------------------|
|                                                                                                                            |                  | Included<br>N=3390 | Excluded<br>N=1911 |
| <b>Demographics at Exam 1</b>                                                                                              |                  |                    |                    |
| Age, years, mean $\pm$ SD                                                                                                  | 55 $\pm$ 13      | 55 $\pm$ 13        | 56 $\pm$ 12        |
| Male, n (%)                                                                                                                | 1934 (36)        | 1266 (37)          | 668 (35)           |
| Education: $\leq$ high school diploma, n (%)                                                                               | 2049 (39)        | 1221 (36)          | 828 (43)           |
| Lower-middle income, n (%)                                                                                                 | 1798 (34)        | 1051 (31)          | 747 (39)           |
| Not employed, n (%)                                                                                                        | 3294 (62)        | 2118 (62)          | 1176 (62)          |
| <b>Comorbidities</b>                                                                                                       |                  |                    |                    |
| BMI $>$ 30, kg/m <sup>2</sup> , mean $\pm$ SD                                                                              | 32 $\pm$ 7       | 32 $\pm$ 7         | 32 $\pm$ 7         |
| Former/current smoker, n (%)                                                                                               | 1716 (32)        | 1015 (30)          | 701 (37)           |
| Hypertension, n (%)                                                                                                        | 3188 (60)        | 2051 (61)          | 1137 (60)          |
| Diabetes, n (%)                                                                                                            | 1152 (22)        | 727 (21)           | 425 (22)           |
| Self-reported history of CVD, n (%)                                                                                        | 572 (11)         | 366 (11)           | 206 (11)           |
| CKD awareness, n (%)                                                                                                       | 271 (5)          | 182 (5)            | 89 (5)             |
| eGFR, mean $\pm$ SD                                                                                                        |                  |                    |                    |
| At visit 1                                                                                                                 | 94 $\pm$ 22      | 93 $\pm$ 24        | 95 $\pm$ 18        |
| At visit 3                                                                                                                 | 85 $\pm$ 23      | 86 $\pm$ 24        | 85 $\pm$ 22        |
| Albumin-to-creatinine ratio, median [IQR]                                                                                  |                  |                    |                    |
| At visit 1                                                                                                                 | 6 [4-13]         | 6 [4-12]           | 9 [5-26]           |
| At visit 3                                                                                                                 | 7 [5-16]         | 7 [5-16]           | 7 [5-16]           |
| <b>Psychosocial measures at Exam 1, mean <math>\pm</math> SD</b>                                                           |                  |                    |                    |
| Perceived discrimination                                                                                                   |                  |                    |                    |
| Daily                                                                                                                      | 9.69 $\pm$ 9.14  | 9.29 $\pm$ 8.96    | 10.41 $\pm$ 9.41   |
| Lifetime                                                                                                                   | 2.94 $\pm$ 2.12  | 2.95 $\pm$ 2.16    | 2.92 $\pm$ 2.04    |
| Burden of lifetime                                                                                                         | 3.74 $\pm$ 2.44  | 3.68 $\pm$ 2.42    | 3.85 $\pm$ 2.47    |
| Anger                                                                                                                      |                  |                    |                    |
| In                                                                                                                         | 5.38 $\pm$ 3.48  | 5.32 $\pm$ 3.48    | 5.5 $\pm$ 3.48     |
| Out                                                                                                                        | 4.46 $\pm$ 3.12  | 4.41 $\pm$ 3.11    | 4.58 $\pm$ 3.15    |
| Hostility                                                                                                                  | 11.69 $\pm$ 4.87 | 11.59 $\pm$ 4.85   | 11.91 $\pm$ 4.91   |
| John Henryism                                                                                                              | 29.73 $\pm$ 4.46 | 29.77 $\pm$ 4.44   | 29.67 $\pm$ 4.5    |
| Stress                                                                                                                     | 5.14 $\pm$ 4.38  | 5 $\pm$ 4.31       | 5.39 $\pm$ 4.5     |
| Pessimism                                                                                                                  | 2.2 $\pm$ 2.22   | 2.02 $\pm$ 2.14    | 2.51 $\pm$ 2.32    |
| Low spirituality                                                                                                           | 6.83 $\pm$ 4.69  | 6.71 $\pm$ 4.66    | 7.06 $\pm$ 4.75    |
| Social status                                                                                                              | 3.39 $\pm$ 2.03  | 3.37 $\pm$ 2.03    | 3.43 $\pm$ 2.02    |
| Perceived social support                                                                                                   | 6.08 $\pm$ 2.68  | 6.04 $\pm$ 2.69    | 6.15 $\pm$ 2.67    |
| BMI, body mass index; CVD, cardiovascular disease; CKD, chronic kidney disease; eGFR, estimated glomerular filtration rate |                  |                    |                    |

**Supplemental Table 2: Associations between psychosocial variables and CKD outcomes in the Jackson Heart Study**

| Psychosocial measures, stratified by corresponding factors | Prevalent CKD<br>OR (95% CI) <sup>a</sup> |                   | Incident CKD<br>OR (95% CI) <sup>a</sup> |                   | eGFR decline<br>$\beta$ (95% CI) <sup>b</sup> |                           |
|------------------------------------------------------------|-------------------------------------------|-------------------|------------------------------------------|-------------------|-----------------------------------------------|---------------------------|
|                                                            | Model 1                                   | Model 2           | Model 1                                  | Model 2           | Model 1                                       | Model 2                   |
| Stressors                                                  |                                           |                   |                                          |                   |                                               |                           |
| Daily discrimination                                       | 1.00 (0.99, 1.01)                         | 0.99 (0.97, 1.01) | <b>1.02 (1.00-1.04)</b>                  | 1.01 (0.98, 1.03) | 0.01 (-0.04, 0.02)                            | 0.01 (-0.01, 0.02)        |
| Lifetime discrimination                                    | 0.96 (0.91, 1.02)                         | 0.92 (0.84, 1.01) | 1.02 (0.94, 1.11)                        | 1.04 (0.93, 1.16) | 0.01 (-0.03, 0.06)                            | 0.003 (-0.05, 0.06)       |
| Burden of lifetime discrimination                          | <b>0.94 (0.89, 0.98)</b>                  | 0.98 (0.92, 1.06) | 0.95 (0.89, 1.03)                        | 0.96 (0.87, 1.05) | -0.01 (-0.04, 0.03)                           | 0.01 (-0.03, 0.06)        |
| Stress                                                     | 0.99 (0.97, 1.02)                         | 0.97 (0.93, 1.01) | 1.02 (0.98, 1.06)                        | 1.03 (0.98, 1.08) | 0.01 (-0.01, 0.03)                            | -0.002 (-0.03, 0.02)      |
| Moods                                                      |                                           |                   |                                          |                   |                                               |                           |
| Anger in                                                   | 1.02 (0.98, 1.06)                         | 1.02 (0.97, 1.07) | 1.00 (0.95, 1.06)                        | 1.00 (0.93, 1.07) | <b>0.04 (0.01, 0.07)</b>                      | <b>0.03 (0.004, 0.06)</b> |
| Anger out                                                  | 1.01 (0.97, 1.05)                         | 1.04 (0.99, 1.10) | 1.05 (0.99, 1.11)                        | 1.03 (0.96, 1.10) | -0.001 (-0.03, 0.03)                          | -0.01 (-0.04, 0.02)       |
| Hostility                                                  | 1.01 (0.99, 1.04)                         | 1.02 (0.99, 10.6) | 1.01 (0.97, 1.01)                        | 0.98 (0.94, 1.03) | -0.01 (-0.03, 0.01)                           | -0.01 (-0.04, 0.01)       |
| Coping                                                     |                                           |                   |                                          |                   |                                               |                           |
| Social status                                              | 1.03 (0.97, 1.09)                         | 1.05 (0.97, 1.13) | 0.99 (0.90, 1.08)                        | 0.93 (0.84, 1.03) | 0.02 (-0.02, 0.06)                            | -0.003 (-0.05, 0.05)      |
| Perceived social support                                   | 0.99 (0.95, 1.03)                         | 0.99 (0.94, 1.05) | 1.02 (0.96, 1.08)                        | 1.00 (0.93, 1.07) | -0.01 (-0.04, 0.02)                           | -0.02 (-0.06, 0.02)       |
| John Henryism                                              | 0.99 (0.97, 1.02)                         | 0.98 (0.95, 1.01) | 0.99 (0.95, 1.03)                        | 1.00 (0.96, 1.05) | 0.005 (-0.01, 0.02)                           | 0.01 (-0.01, 0.03)        |
| Low spirituality                                           | 1.01 (0.99, 1.04)                         | 1.01 (0.97, 1.04) | 0.98 (0.95, 1.02)                        | 0.97 (0.92, 1.01) | -0.01 (-0.03, 0.01)                           | -0.01 (-0.03, 0.01)       |
| Pessimism                                                  | --                                        | 0.95 (0.88, 1.02) | --                                       | 1.06 (0.97, 1.15) | --                                            | 0.04 (-0.01, 0.08)        |

CKD, chronic kidney disease; OR, odds ratio; CI, confidence interval; eGFR, estimated glomerular filtration rate  
Models were fitted using <sup>a</sup>logistic regression (binary outcome) or <sup>b</sup>linear regression (continuous outcome variable; mL/min/1.73m<sup>2</sup> per year) prior to conducting factor analysis  
All models were adjusted for age, sex, body mass index, family income, employment status, educational attainment, smoking status, diabetes, hypertension, and self-reported history of cardiovascular disease; eGFR decline model<sup>b</sup> was additionally adjusted for baseline eGFR and ACR  
Model 1 was restricted to psychosocial measures that loaded on a given factor, whereas Model 2 included all psychosocial measures

**Supplemental Table 3: Pairwise correlations between psychosocial variables for each CKD outcome**

**A) Prevalent CKD:**

|                          | Perceived discrimination |          |        | Stress | Social status | John Henryism | Low spirituality | Anger in | Anger out | Hostility | Pessimism | Social Support |
|--------------------------|--------------------------|----------|--------|--------|---------------|---------------|------------------|----------|-----------|-----------|-----------|----------------|
|                          | Daily                    | Lifetime | Burden |        |               |               |                  |          |           |           |           |                |
| Perceived discrimination |                          |          |        |        |               |               |                  |          |           |           |           |                |
| Daily                    | 1.00                     | 0.42     | 0.37   | 0.34   | 0.12          | -0.03         | 0.07             | 0.24     | 0.17      | 0.21      | 0.11      | 0.10           |
| Lifetime                 | 0.42                     | 1.00     | 0.49   | 0.28   | 0.00          | -0.08         | 0.09             | 0.13     | 0.09      | 0.06      | 0.00      | 0.06           |
| Burden                   | 0.37                     | 0.49     | 1.00   | 0.29   | 0.02          | -0.05         | 0.16             | 0.20     | 0.10      | 0.13      | 0.10      | 0.07           |
| Stress                   | 0.34                     | 0.28     | 0.29   | 1.00   | 0.18          | -0.13         | 0.15             | 0.28     | 0.18      | 0.13      | 0.11      | 0.09           |
| Social status            | 0.12                     | 0.00     | 0.02   | 0.18   | 1.00          | -0.10         | 0.16             | 0.17     | 0.11      | 0.05      | 0.09      | 0.14           |
| John Henryism            | -0.03                    | -0.08    | -0.05  | -0.13  | -0.10         | 1.00          | -0.12            | -0.05    | 0.03      | 0.11      | -0.02     | -0.03          |
| Low spirituality         | 0.07                     | 0.09     | 0.16   | 0.15   | 0.16          | -0.12         | 1.00             | 0.24     | 0.10      | 0.12      | 0.11      | 0.15           |
| Anger in                 | 0.24                     | 0.13     | 0.20   | 0.28   | 0.17          | -0.05         | 0.24             | 1.00     | 0.37      | 0.34      | 0.13      | 0.14           |
| Anger out                | 0.17                     | 0.09     | 0.10   | 0.18   | 0.11          | 0.03          | 0.10             | 0.37     | 1.00      | 0.30      | 0.05      | 0.07           |
| Hostility                | 0.21                     | 0.06     | 0.13   | 0.13   | 0.05          | 0.11          | 0.12             | 0.34     | 0.30      | 1.00      | 0.19      | 0.08           |
| Pessimism                | 0.11                     | 0.00     | 0.10   | 0.11   | 0.09          | -0.02         | 0.11             | 0.13     | 0.05      | 0.19      | 1.00      | 0.04           |
| Social support           | 0.10                     | 0.06     | 0.07   | 0.09   | 0.14          | -0.03         | 0.15             | 0.14     | 0.07      | 0.08      | 0.04      | 1.00           |

Supplemental material is neither peer-reviewed nor thoroughly edited by CJASN. The authors alone are responsible for the accuracy and presentation of the material.

**B) eGFR decline:**

|                          | Perceived discrimination |          |        | Stress | Social status | John Henryism | Low spirituality | Anger In | Anger Out | Hostility | Pessimism | Social Support |
|--------------------------|--------------------------|----------|--------|--------|---------------|---------------|------------------|----------|-----------|-----------|-----------|----------------|
|                          | Daily                    | Lifetime | Burden |        |               |               |                  |          |           |           |           |                |
| Perceived discrimination |                          |          |        |        |               |               |                  |          |           |           |           |                |
| Daily                    | 1.00                     | 0.43     | 0.38   | 0.33   | 0.11          | -0.02         | 0.05             | 0.23     | 0.15      | 0.22      | 0.10      | 0.09           |
| Lifetime                 | 0.43                     | 1.00     | 0.47   | 0.27   | -0.02         | -0.08         | 0.09             | 0.14     | 0.09      | 0.06      | 0.00      | 0.05           |
| Burden                   | 0.38                     | 0.47     | 1.00   | 0.27   | 0.01          | -0.05         | 0.15             | 0.18     | 0.09      | 0.12      | 0.09      | 0.05           |
| Stress                   | 0.33                     | 0.27     | 0.27   | 1.00   | 0.19          | -0.12         | 0.15             | 0.28     | 0.17      | 0.13      | 0.10      | 0.09           |
| Social status            | 0.11                     | -0.02    | 0.02   | 0.19   | 1.00          | -0.10         | 0.14             | 0.16     | 0.09      | 0.03      | 0.11      | 0.13           |
| John Henryism            | -0.02                    | -0.08    | -0.05  | -0.12  | -0.10         | 1.00          | -0.12            | -0.06    | 0.02      | 0.13      | -0.03     | -0.04          |
| Low spirituality         | 0.05                     | 0.09     | 0.15   | 0.15   | 0.14          | -0.12         | 1.00             | 0.23     | 0.11      | 0.12      | 0.11      | 0.15           |
| Anger in                 | 0.23                     | 0.14     | 0.18   | 0.28   | 0.16          | -0.06         | 0.23             | 1.00     | 0.36      | 0.33      | 0.12      | 0.14           |
| Anger out                | 0.15                     | 0.09     | 0.09   | 0.17   | 0.09          | 0.02          | 0.11             | 0.36     | 1.00      | 0.30      | 0.05      | 0.06           |
| Hostility                | 0.22                     | 0.06     | 0.12   | 0.13   | 0.03          | 0.13          | 0.13             | 0.33     | 0.30      | 1.00      | 0.19      | 0.07           |
| Pessimism                | 0.11                     | 0.00     | 0.09   | 0.10   | 0.11          | -0.03         | 0.11             | 0.12     | 0.05      | 0.19      | 1.00      | 0.04           |
| Social support           | 0.09                     | 0.05     | 0.05   | 0.09   | 0.13          | -0.04         | 0.15             | 0.14     | 0.06      | 0.07      | 0.04      | 1.00           |

**C) Incident CKD:**

|                          | Perceived discrimination |          |        | Stress | Social status | John Henryism | Low spirituality | Anger In | Anger Out | Hostility | Pessimism | Social Support |
|--------------------------|--------------------------|----------|--------|--------|---------------|---------------|------------------|----------|-----------|-----------|-----------|----------------|
|                          | Daily                    | Lifetime | Burden |        |               |               |                  |          |           |           |           |                |
| Perceived discrimination |                          |          |        |        |               |               |                  |          |           |           |           |                |
| Daily                    | 1.00                     | 0.43     | 0.39   | 0.33   | 0.11          | -0.02         | 0.06             | 0.22     | 0.13      | 0.24      | 0.10      | 0.08           |
| Lifetime                 | 0.43                     | 1.00     | 0.49   | 0.27   | -0.01         | -0.08         | 0.09             | 0.13     | 0.08      | 0.08      | 0.00      | 0.05           |
| Burden                   | 0.39                     | 0.49     | 1.00   | 0.27   | 0.01          | -0.05         | 0.13             | 0.18     | 0.10      | 0.14      | 0.08      | 0.05           |
| Stress                   | 0.33                     | 0.27     | 0.27   | 1.00   | 0.18          | -0.11         | 0.14             | 0.29     | 0.18      | 0.15      | 0.10      | 0.09           |
| Social status            | 0.11                     | -0.01    | 0.01   | 0.18   | 1.00          | -0.10         | 0.13             | 0.17     | 0.11      | 0.06      | 0.12      | 0.13           |
| John Henryism            | -0.02                    | -0.08    | -0.05  | -0.11  | -0.10         | 1.00          | -0.14            | -0.07    | 0.01      | 0.11      | -0.03     | -0.04          |
| Low spirituality         | 0.06                     | 0.09     | 0.13   | 0.14   | 0.13          | -0.14         | 1.00             | 0.23     | 0.12      | 0.14      | 0.11      | 0.15           |
| Anger in                 | 0.22                     | 0.13     | 0.18   | 0.29   | 0.17          | -0.07         | 0.23             | 1.00     | 0.36      | 0.34      | 0.13      | 0.14           |
| Anger out                | 0.13                     | 0.08     | 0.10   | 0.18   | 0.11          | 0.01          | 0.12             | 0.36     | 1.00      | 0.28      | 0.03      | 0.06           |
| Hostility                | 0.24                     | 0.08     | 0.14   | 0.15   | 0.06          | 0.11          | 0.14             | 0.34     | 0.28      | 1.00      | 0.18      | 0.06           |
| Pessimism                | 0.11                     | 0.00     | 0.08   | 0.10   | 0.12          | -0.03         | 0.11             | 0.13     | 0.03      | 0.18      | 1.00      | 0.04           |
| Social support           | 0.08                     | 0.05     | 0.05   | 0.09   | 0.13          | -0.04         | 0.15             | 0.14     | 0.06      | 0.06      | 0.04      | 1.00           |

Supplemental material is neither peer-reviewed nor thoroughly edited by CJASN. The authors alone are responsible for the accuracy and presentation of the material.

**Supplemental Table 4: Sensitivity analysis for the associations between psychosocial factors and CKD outcomes in the Jackson Heart Study with systolic blood pressure included in the models**

| Psychosocial factors | Prevalent CKD<br>OR (95% CI) <sup>a</sup> | Incident CKD<br>OR (95% CI) <sup>a</sup> | eGFR decline<br>$\beta$ (95% CI) <sup>b</sup> |
|----------------------|-------------------------------------------|------------------------------------------|-----------------------------------------------|
| Stressors            | 0.76 (0.65, 0.89)*                        | 1.07 (0.88, 1.29)                        | 0.08 (-0.02, 0.17)                            |
| Moods                | 1.12 (0.96, 1.29)                         | 1.02 (0.84, 1.24)                        | 0.03 (-0.06, 0.13)                            |
| Coping               | 1.09 (0.93, 1.27)                         | 0.91 (0.75, 1.11)                        | -0.02 (-0.12, 0.08)                           |

CKD, chronic kidney disease; OR, odds ratio; CI, confidence interval; eGFR, estimated glomerular filtration rate.  
 Estimates are from <sup>a</sup>logistic regression (binary outcome) or <sup>b</sup>linear regression (continuous outcome variable; mL/min/1.73m<sup>2</sup> per year).  
 All models adjusted for age, sex, diabetes, systolic blood pressure (kept continuous), cardiovascular disease, family income, employment status, educational attainment, smoking status, and body mass index; eGFR decline model<sup>b</sup> additionally adjusted for baseline eGFR and ACR.  
 \*P < 0.05; <sup>†</sup>P < 0.1
